# Supplementary material
Source: MDPI journal article supplement (https://www.mdpi.com/2254-9625/13/9/133)
Supplement: s1 [file s1]

## **Search strategy**

### **Medline/CINAHL/PsycINFO:**

1st string: psycholog\* counsel\* OR psycholog\* intervention OR university counsel\* service\* OR university counsel\* center\* OR university counsel\* centre\*

AND

2nd string: university student\* OR college student\*

### **SCOPUS:**

( TITLE-ABS-KEY ( "psycholog\* counsel\*" OR "psycholog\* intervention" OR "university counsel\* service\*" OR "university counsel\* center\*" OR "university counsel\* centre\*" ) AND TITLE-ABS-KEY ( "university student\*" OR "college student\*" ) )

### **PubMed:**

(psycholog\* counsel\*[Title/Abstract] OR psycholog\* intervention[Title/Abstract] OR university counsel\* service\*[Title/Abstract] OR university counsel\* center\*[Title/Abstract] OR university counsel\* centre\*[Title/Abstract]) AND (university student\*[Title/Abstract] OR college student\*[Title/Abstract])
